# Supplementary material
Source: PubMed Central journal article supplement (PMC10231490)
Supplement: ebmental-2019-300124supp001.pdf [file ebmental-2019-300124supp001.pdf]

## Assessing the European impact of alcohol misuse and illicit drug dependence research: clinical practice guidelines and evidence-base policy

Elena Pallari<sup>1,2</sup>, Tayana Soukup<sup>2</sup>, Andri Kyriacou<sup>3</sup> and Grant Lewison<sup>4</sup>

### Author affiliations

<sup>1</sup> MRC Clinical Trials and Methodology, University College London, London, WC1, UK

<sup>2</sup> King's College London, Institute of Psychiatry, Psychology & Neuroscience (IoPPN), Centre for Implementation Science, De Crespigny Park, Denmark Hill, London, SE5 8AF, United Kingdom

<sup>3</sup> King's College London, National Addiction Centre, IoPPN, Addiction Sciences Building, 4 Windsor Walk, Denmark Hill, London, SE5 8BB

<sup>4</sup> King's College London, Division of Cancer Studies, Research Oncology, Institute of Cancer Policy, Guy's Hospital, King's College London, Great Maze Pond, London, SE1 9RT, United Kingdom

### Email-address for correspondence

 Ms Elena Pallari: [elena.pallari@kcl.ac.uk](mailto:elena.pallari@kcl.ac.uk)

### Supplementary File

**Table 1:** The EUR31 and other leading countries and their ISO2 codes

| ISO2 code | Country         | ISO2 code | Country  | ISO2 code | Country      | ISO2 code | Country         |
|-----------|-----------------|-----------|----------|-----------|--------------|-----------|-----------------|
| AT        | Austria*        | DK        | Denmark* | IS        | Iceland**    | PL        | Poland*         |
| AU        | Australia       | EE        | Estonia* | IT        | Italy*       | PT        | Portugal*       |
| BE        | Belgium*        | ES        | Spain*   | JP        | Japan        | RO        | Romania*        |
| BG        | Bulgaria*       | FI        | Finland* | KR        | South Korea  | SE        | Sweden*         |
| BR        | Brazil          | FR        | France*  | LT        | Lithuania*   | SI        | Slovenia*       |
| CA        | Canada          | GR        | Greece*  | LU        | Luxembourg*  | SK        | Slovakia*       |
| CH        | Switzerland**   | HR        | Croatia* | LV        | Latvia*      | TR        | Turkey          |
| CN        | China (P.R.)    | HU        | Hungary* | MT        | Malta*       | TW        | Taiwan          |
| CY        | Cyprus*         | IE        | Ireland* | NL        | Netherlands* | UK        | United Kingdom* |
| CZ        | Czech Republic* | IL        | Israel   | NZ        | New Zealand  | US        | United States   |
| DE        | Germany*        | IN        | India    | NO        | Norway**     |           |                 |

*Note.* EUR31 = 28 European Union States\* and 3 European Free Trade Association Countries\*\*.

ISO2 = International Standards Organisation.

**Table 2.** A list of the health advisory committees and examined newspapers in each European country.

| <i>ISO2 code</i> | <i>Country</i> | <i>CPG organisation</i>                                                                                                                                                                                                                                                    | <i>Health Advisory Committees</i>                                                                                                                           |
|------------------|----------------|----------------------------------------------------------------------------------------------------------------------------------------------------------------------------------------------------------------------------------------------------------------------------|-------------------------------------------------------------------------------------------------------------------------------------------------------------|
| <i>AT</i>        | Austria        | <b>None on ALC/ADD</b>                                                                                                                                                                                                                                                     | ÖÄK, Gesundheit GV AT, Österreichische Liga für Kinder, PHARMIG                                                                                             |
| <i>BE</i>        | Belgium        | Aanbeveling voor Goede Medische Praktijkvoering                                                                                                                                                                                                                            | <b>None</b>                                                                                                                                                 |
| <i>BG</i>        | Bulgaria       | <b>None on ALC/ADD</b>                                                                                                                                                                                                                                                     | Health Research                                                                                                                                             |
| <i>CH</i>        | Switzerland    | <b>None on ALC/ADD</b>                                                                                                                                                                                                                                                     | GDK, FMH, Health promotion                                                                                                                                  |
| <i>CY</i>        | Cyprus         | <b>None on ALC/ADD</b>                                                                                                                                                                                                                                                     | National Bioethics Committee for Biomedical Research, Cyprus Mental Health Commission, Cyprus Anti-Drugs Council                                            |
| <i>CZ</i>        | Czech Republic | Česká psychiatrická společnost o. s.                                                                                                                                                                                                                                       | Metabolic Endocrinology, Cardiovascular, Oncology, Neuroscience Mental                                                                                      |
| <i>DE</i>        | Germany        | <b>None on ALC/ADD</b>                                                                                                                                                                                                                                                     | Sachverständigenrat, GBA, Commission "Evaluation of Performance in Research and Education", Commission Clinical Guidelines, BÄK - Scientific Advisory Board |
| <i>DK</i>        | Denmark        | <b>None on ALC/ADD</b>                                                                                                                                                                                                                                                     | Health Committee, Research Ethics Committee                                                                                                                 |
| <i>EE</i>        | Estonia        | Tervise Arengu Instituut                                                                                                                                                                                                                                                   | Public Health, Research and Development                                                                                                                     |
| <i>ES</i>        | Spain          | Sociedad Gallega de Medicina Interna; Servicio de Medicina Interna Hospital Lucus Augusti; Agència de Salut Pública de Catalunya; Hospital Universitario de A Coruña. Servizo Galego de Saúde; Grupo de Alcohol de la Asociación Galega de Medicina Familiar e Comunitaria | Public Health                                                                                                                                               |
| <i>FI</i>        | Finland        | Suomalaisen Lääkäriseuran Duodecimin ja Suomen Päihdelääketieteen yhdistyksen asettama työryhmä                                                                                                                                                                            | <b>None</b>                                                                                                                                                 |
| <i>FR</i>        | France         | <b>None on ALC/ADD</b>                                                                                                                                                                                                                                                     | HCSP Health inequalities, HCSP Eval, strat & forecast, HCSP Environmental risks                                                                             |
| <i>GR</i>        | Greece         | <b>None on ALC/ADD</b>                                                                                                                                                                                                                                                     | <b>None</b>                                                                                                                                                 |
| <i>HR</i>        | Croatia        | Hrvatski liječnički zbor                                                                                                                                                                                                                                                   | <b>None</b>                                                                                                                                                 |

|           |                |                                                                                                |                                                                                                                                                                             |
|-----------|----------------|------------------------------------------------------------------------------------------------|-----------------------------------------------------------------------------------------------------------------------------------------------------------------------------|
| <i>HU</i> | Hungary        | Az Egészségügyi Minisztérium szakmai protokollja                                               | Hungarian Diabetes Association, Hungarian Cancer Society, Hungarian Society of Cardiology, Hungarian Respiratory Society, Hungarian Psychiatric Association                 |
| <i>IE</i> | Ireland        | <b>None on ALC/ADD</b>                                                                         | Irish National Advisory Committee on Drugs, National Advisory Committee on Bioethics                                                                                        |
| <i>IT</i> | Italy          | <b>None on ALC/ADD</b>                                                                         | Public Health, National committee for diabetes, Scientific committee of the National Health Institute, Nazional center for prevention of diseases and monitoring activities |
| <i>LT</i> | Lithuania      | Pasaulinės biologinės psichiatrijos draugijų federacijos                                       | National Health board, Health Research, Public Health, Mental Health, Nutrition, Health and the Environment, Medicine, Genetics, Health Ethics and Health Law               |
| <i>LU</i> | Luxembourg     | <b>None on ALC/ADD</b>                                                                         | Board of Experts of Luxembourg                                                                                                                                              |
| <i>LV</i> | Latvia         | <b>None on ALC/ADD</b>                                                                         | <b>None</b>                                                                                                                                                                 |
| <i>MT</i> | Malta          | <b>None on ALC/ADD</b>                                                                         | <b>None</b>                                                                                                                                                                 |
| <i>NL</i> | Netherlands    | Nederlandse Vereniging voor Psychiatrie                                                        | Health Research, Genetics, Health and the environment, Nutrition, Public Health                                                                                             |
| <i>NO</i> | Norway         | <b>None on ALC/ADD</b>                                                                         | <b>None</b>                                                                                                                                                                 |
| <i>PL</i> | Poland         | <b>None on ALC/ADD</b>                                                                         | Scientific Council, Anti-cancer council MH, Medicine (various specialities)                                                                                                 |
| <i>PT</i> | Portugal       | <b>None on ALC/ADD</b>                                                                         | Public Health                                                                                                                                                               |
| <i>RO</i> | Romania        | <b>None on ALC/ADD</b>                                                                         | <b>None</b>                                                                                                                                                                 |
| <i>SE</i> | Sweden         | Socialstyrelsen                                                                                | <b>None</b>                                                                                                                                                                 |
| <i>SI</i> | Slovenia       | <b>None on ALC/ADD</b>                                                                         | <b>None</b>                                                                                                                                                                 |
| <i>SK</i> | Slovakia       | <b>None on ALC/ADD</b>                                                                         | <b>None</b>                                                                                                                                                                 |
| <i>UK</i> | United Kingdom | Scottish Intercollegiate Guidelines Network; National Institute for health and Care Excellence | Obesity Review Group, End of Life                                                                                                                                           |

**Table 3:** Tally of clinical practice guidelines with the numbers of references used from 11 European Member States for alcohol and illicit drug dependence alongside the total number of cited references within the guidelines (provided in brackets), between 2002 and 2013.

| Country<br>(ISO2 code) | Alcohol dependence    |                       | Illicit drug dependence |                       | Both                  |                       |
|------------------------|-----------------------|-----------------------|-------------------------|-----------------------|-----------------------|-----------------------|
|                        | Guidelines<br>(count) | References<br>(count) | Guidelines<br>(count)   | References<br>(count) | Guidelines<br>(count) | References<br>(count) |
| United Kingdom (UK)    | 2                     | 685                   | 3                       | 502                   | 5                     | 1187                  |
| Sweden (SE)            | 0                     | 0                     | 1                       | 271                   | 1                     | 271                   |
| Spain (ES)             | 4                     | 153                   | 1                       | 124                   | 5                     | 277                   |
| Lithuania (LT)         | 1                     | 141                   | 2                       | 398                   | 3                     | 539                   |
| Belgium (BE)           | 1                     | 52                    | 1                       | 22                    | 2                     | 74                    |
| Netherlands (NL)       | 1                     | 257                   | 1                       | 71                    | 2                     | 328                   |
| Croatia (HR)           | 1                     | 16                    | 0                       | 0                     | 1                     | 16                    |
| Czech Republic (CZ)    | 1                     | 21                    | 1                       | 15                    | 2                     | 36                    |
| Finland (FI)           | 1                     | 148                   | 1                       | 226                   | 2                     | 374                   |
| <b>Hungary (HU)</b>    | <b>0</b>              | <b>0</b>              | <b>3</b>                | <b>84</b>             | <b>3</b>              | <b>84</b>             |
| <b>Estonia (EE)</b>    | <b>1</b>              | <b>11</b>             | <b>1</b>                | <b>4</b>              | <b>2</b>              | <b>15</b>             |
| <b>Overall</b>         | 13                    | 1484                  | 15                      | 1717                  | 28                    | 3201                  |

Note. ISO2 = International Standards Organisation.

**Table 4.** Fractional counts and percentages of cited references used by countries in the clinical practice guidelines related to alcohol and illicit drug addiction

| ISO2<br>code | Alcohol dependency |                  | Illicit drug dependence |                  | ISO2<br>code | Alcohol dependency |                  | Illicit drug dependence |                  |
|--------------|--------------------|------------------|-------------------------|------------------|--------------|--------------------|------------------|-------------------------|------------------|
|              | %                  | Fractional count | %                       | Fractional count |              | %                  | Fractional count | %                       | Fractional count |
| <b>US*</b>   | 48.5               | 719              | 52.5                    | 902              | <b>DK</b>    | 1.1                | 15.7             | 0.7                     | 11.2             |
| <b>UK</b>    | 14.6               | 217              | 11.3                    | 193              | <b>BE</b>    | 0.8                | 11.9             | 0.7                     | 12.4             |
| <b>AU*</b>   | 3.8                | 55.9             | 6.6                     | 113              | <b>NZ*</b>   | 0.7                | 10.5             | 0.5                     | 8.3              |
| <b>DE</b>    | 4.7                | 70.3             | 4.0                     | 68.4             | <b>JP*</b>   | 1.0                | 14.7             | 0.2                     | 3.8              |
| <b>IT</b>    | 3.3                | 49.1             | 3.5                     | 59.8             | <b>IN*</b>   | 0.6                | 9.4              | 0.3                     | 5.3              |
| <b>CA*</b>   | 4.0                | 59.0             | 2.7                     | 46.9             | <b>IE</b>    | 0.2                | 2.4              | 0.3                     | 5.5              |
| <b>SE</b>    | 2.1                | 31.4             | 3.1                     | 53.3             | <b>GR</b>    | 0.3                | 4.1              | 0.2                     | 3.4              |
| <b>ES</b>    | 1.9                | 28.8             | 1.8                     | 30.5             | <b>PL</b>    | 0.5                | 7.0              | 0.0                     | 0.4              |
| <b>FI</b>    | 2.8                | 41.0             | 1.1                     | 18.1             | <b>IL*</b>   | 0.1                | 1.0              | 0.3                     | 5.5              |
| <b>NL</b>    | 1.3                | 19.1             | 2.2                     | 37.2             | <b>KR*</b>   | 0.4                | 5.5              | 0.0                     | 0.8              |
| <b>FR</b>    | 1.8                | 26.3             | 1.5                     | 24.9             | <b>BR*</b>   | 0.2                | 3.1              | 0.2                     | 3.0              |
| <b>CH</b>    | 0.9                | 12.9             | 1.5                     | 25.8             | <b>CN*</b>   | 0.1                | 1.4              | 0.2                     | 4.1              |
| <b>AT</b>    | 0.7                | 10.8             | 1.0                     | 17.3             | <b>TW*</b>   | 0.2                | 2.7              | 0.2                     | 2.8              |
| <b>NO*</b>   | 1.0                | 14.4             | 0.7                     | 12.6             | <b>TR*</b>   | 0.1                | 1.0              | 0.1                     | 1.6              |

Note. \*Non-European countries. ISO2 = International Standards Organisation. For country codes, see Table 1.

**Table 5.** Expected and observed values of country over-citation ratio for clinical practice guidelines (CPGs) compared with the Web of Science papers in 2010 in areas of alcohol and drug addictions

| Country<br>(ISO2 code) | Alcohol dependence     |                        | Illicit drug dependence |                        |
|------------------------|------------------------|------------------------|-------------------------|------------------------|
|                        | Expected               | Observed               | Expected                | Observed               |
|                        | over-citation<br>ratio | over-citation<br>ratio | over-citation<br>ratio  | over-citation<br>ratio |
| Spain (ES)             | 6.6                    | 4.1                    | 6.7                     | 6.1                    |
| Finland (FI)           |                        |                        | 10.6                    | 32.7                   |
| Netherlands (NL)       | 9.7                    | 4.8                    | 9.5                     | 18.4                   |
| Sweden (SE)            | 13.8                   | 69.1                   |                         |                        |
| United Kingdom (UK)    | 3.9                    | 10.3                   | 5.2                     | 16.3                   |

*Note.* ISO2 = International Standards Organisation.

**Table 6.** Citation performance of the EUR31 countries in research related to **alcohol dependence** from 2002 to 2013 in terms of (a) arithmetic means for five-year citation scores, (b) geometric means, and (c) world-scale value (presence in the top 5% compared with the European norm of 100). *Note.* There were no papers related to alcohol dependence for Cyprus or Malta.

| <b>ISO2 code</b> | Arithmetic mean | Geometric mean | World-scale values | <b>ISO2 code</b> | Arithmetic mean | Geometric mean | World-scale values | <b>ISO2 code</b> | Arithmetic mean | Geometric mean | World-scale values |
|------------------|-----------------|----------------|--------------------|------------------|-----------------|----------------|--------------------|------------------|-----------------|----------------|--------------------|
| <b>NL</b>        | 15.0            | 9.1            | 158                | <b>GR</b>        | 10.2            | 6.0            | 96                 | <b>SK</b>        | 4.6             | 2.8            | 15                 |
| <b>CH</b>        | 14.4            | 8.7            | 156                | <b>AT</b>        | 10.4            | 6.3            | 59                 | <b>EE</b>        | 6.0             | 4.7            | 0                  |
| <b>IT</b>        | 13.4            | 8.6            | 114                | <b>SE</b>        | 10.3            | 6.9            | 45                 | <b>CZ</b>        | 6.6             | 4.2            | 0                  |
| <b>BE</b>        | 13.2            | 8.6            | 106                | <b>FI</b>        | 9.6             | 6.5            | 54                 | <b>RO</b>        | 4.3             | 2.2            | 14                 |
| <b>UK</b>        | 11.5            | 7.4            | 95                 | <b>ES</b>        | 10.2            | 6.0            | 70                 | <b>SI</b>        | 4.0             | 2.5            | 0                  |
| <b>DE</b>        | 12.3            | 7.3            | 94                 | <b>IE</b>        | 8.7             | 6.3            | 38                 | <b>HR</b>        | 3.3             | 2.2            | 0                  |
| <b>LU</b>        | 14.8            | 11.6           | 0                  | <b>PT</b>        | 8.8             | 6.2            | 34                 | <b>LT</b>        | 2.6             | 1.7            | 0                  |
| <b>NO</b>        | 11.6            | 8.2            | 59                 | <b>HU</b>        | 8.5             | 6.1            | 0                  | <b>LV</b>        | 1.5             | 1.4            | 0                  |
| <b>DK</b>        | 10.7            | 6.6            | 101                | <b>IS</b>        | 8.8             | 5.3            | 0                  | <b>BG</b>        | 3.2             | 1.4            | 0                  |
| <b>FR</b>        | 11.0            | 5.9            | 95                 | <b>PL</b>        | 6.5             | 4.4            | 15                 |                  |                 |                |                    |

**Table 7.** Citation performance of the EUR31 countries in research related to illicit **drug dependence** from 2002 to 2013 in terms of (a) arithmetic means for five-year citation scores, (b) geometric means, and (c) world-scale value (presence in the top 5% compared with the European norm of 100)

| <b>ISO2 code</b> | Arithmetic mean | Geometric mean | World-scale values | <b>ISO2 code</b> | Arithmetic mean | Geometric mean | World-scale values | <b>ISO2 code</b> | Arithmetic mean | Geometric mean | World-scale values |
|------------------|-----------------|----------------|--------------------|------------------|-----------------|----------------|--------------------|------------------|-----------------|----------------|--------------------|
| <b>NL</b>        | 13.7            | 8.7            | 120                | <b>PT</b>        | 10.6            | 5.9            | 73                 | <b>CZ</b>        | 6.5             | 4.1            | 13                 |
| <b>UK</b>        | 12.9            | 6.8            | 123                | <b>FI</b>        | 10.2            | 5.8            | 78                 | <b>LU</b>        | 7.3             | 3.1            | 0                  |
| <b>DE</b>        | 12.1            | 6.4            | 101                | <b>SE</b>        | 10.0            | 6.1            | 58                 | <b>LT</b>        | 5.6             | 3.9            | 0                  |
| <b>EE</b>        | 10.5            | 7.6            | 102                | <b>BE</b>        | 9.9             | 6.1            | 67                 | <b>RO</b>        | 4.1             | 1.8            | 31                 |
| <b>IT</b>        | 11.7            | 7.1            | 74                 | <b>MT</b>        | 7.8             | 4.9            | 234                | <b>HR</b>        | 4.2             | 2.2            | 0                  |
| <b>FR</b>        | 11.7            | 6.4            | 97                 | <b>NO</b>        | 9.8             | 6.3            | 46                 | <b>BG</b>        | 4.0             | 2.1            | 0                  |
| <b>AT</b>        | 11.0            | 6.6            | 94                 | <b>IS</b>        | 9.4             | 6.4            | 10                 | <b>SI</b>        | 3.2             | 1.6            | 4                  |
| <b>DK</b>        | 11.3            | 7.1            | 56                 | <b>HU</b>        | 9.2             | 5.8            | 49                 | <b>CY</b>        | 3.3             | 2.2            | 0                  |
| <b>ES</b>        | 10.9            | 6.6            | 82                 | <b>GR</b>        | 8.7             | 5.0            | 40                 | <b>SK</b>        | 3.0             | 1.8            | 0                  |
| <b>CH</b>        | 11.0            | 6.2            | 87                 | <b>PL</b>        | 8.1             | 5.6            | 3                  | <b>LV</b>        | 0.0             | 0.0            | 0                  |
| <b>IE</b>        | 10.9            | 5.3            | 156                |                  |                 |                |                    |                  |                 |                |                    |



**Table 8.** The citation rate within clinical guidelines over time relating to alcohol and illicit drug dependence

| Period  | Alcohol dependence |       | Illicit drug dependence |       | Both  |       |
|---------|--------------------|-------|-------------------------|-------|-------|-------|
|         | Total              | %     | Total                   | %     | Total | %     |
| < 1990  | 196                | 13.32 | 99                      | 6.07  | 295   | 9.51  |
| 1990-99 | 461                | 31.32 | 391                     | 23.99 | 852   | 27.47 |
| 2000-04 | 414                | 28.13 | 455                     | 27.91 | 869   | 28.01 |
| 2005-09 | 373                | 25.34 | 520                     | 31.90 | 893   | 28.79 |
| 2010-13 | 28                 | 1.90  | 165                     | 10.12 | 193   | 6.22  |

**Table 9.** Ranking of European countries in **alcohol dependence research** between 2002 and 2013, on five different indicators: (a) papers relative to Gross Domestic Product (GDP), (b) annual average percentage growth, (c) citations in Web of Science, (d) references on clinical practice guidelines (incl. the over-citation ratio), and (e) references in news stories (incl. the over-citation ratio)

| ISO2 code | Papers / GDP | ISO2 code | Annual average percentage growth | ISO2 code | Citations in Web of Science |                |                    | ISO2 code | Clinical Guidelines |                     | ISO2 code | News stories |                     |
|-----------|--------------|-----------|----------------------------------|-----------|-----------------------------|----------------|--------------------|-----------|---------------------|---------------------|-----------|--------------|---------------------|
|           |              |           |                                  |           | Arithmetic mean             | Geometric mean | World-scale values |           | %                   | Over-citation ratio |           | %            | Over-citation ratio |
| FI        | 1.87         | IE        | 26.0                             | NL        | 15.0                        | 9.1            | 158                | AT        | 0.7                 | 2.5                 | DK        | 3.1          | 4.1                 |
| SE        | 1.30         | NO        | 14.5                             | CH        | 14.4                        | 8.7            | 156                | NO        | 1.0                 | 1.9                 | UK        | 14           | 3.5                 |
| DK        | 0.82         | PT        | 10.4                             | IT        | 13.4                        | 8.6            | 114                | IT        | 3.4                 | 1.7                 | NO        | 1.4          | 2.7                 |
| CH        | 0.59         | NL        | 10.3                             | BE        | 13.2                        | 8.6            | 106                | UK        | 5.8                 | 1.4                 | FR        | 4.5          | 2.2                 |
| NL        | 0.59         | CH        | 6.7                              | UK        | 11.5                        | 7.4            | 95                 | DK        | 1.1                 | 1.4                 | SE        | 3.2          | 1.6                 |
| BE        | 0.49         | BE        | 6.7                              | DE        | 12.3                        | 7.3            | 94                 | DE        | 5.0                 | 1.3                 | DE        | 4.7          | 1.2                 |
| ES        | 0.46         | UK        | 6.3                              | LU        | 14.8                        | 11.6           | 0                  | GR        | 0.3                 | 1.2                 | CH        | 0.8          | 0.9                 |
| NO        | 0.44         | DK        | 4.8                              | NO        | 11.6                        | 8.2            | 59                 | SE        | 2.2                 | 1.1                 | NL        | 1.4          | 0.8                 |

Note. ISO2 = International Standards Organisation. For country codes, see Table 1. GDP = Gross Domestic Product.

**Table 10.** Ranking of European countries in **illicit drug dependence research** between 2002 and 2013, on five different indicators: (a) papers relative to Gross Domestic Product (GDP), (b) annual average percentage growth, (c) citations in Web of Science, (d) references on clinical practice guidelines (incl. the over-citation ratio), and (e) references in news stories (incl. the over-citation ratio)

| ISO2<br>code | Papers/<br>GDP | ISO2<br>code | Annual<br>average<br>percentage<br>growth | ISO2<br>code | Citations in Web of Science |                   |                       | ISO2<br>code | Clinical Guidelines |                        | ISO2<br>code | News stories |                        |
|--------------|----------------|--------------|-------------------------------------------|--------------|-----------------------------|-------------------|-----------------------|--------------|---------------------|------------------------|--------------|--------------|------------------------|
|              |                |              |                                           |              | Arithmetic<br>mean          | Geometric<br>mean | World-scale<br>values |              | %                   | Over-citation<br>ratio |              | %            | Over-citation<br>ratio |
| CH           | 1.27           | DK           | 18.5                                      | NL           | 13.7                        | 8.7               | 120                   | IT           | 3.6                 | 1.7                    | UK           | 11.7         | 2.0                    |
| SE           | 1.22           | PT           | 17.2                                      | UK           | 12.9                        | 6.8               | 123                   | FR           | 1.5                 | 1.6                    | FI           | 0.9          | 1.6                    |
| IS           | 1.22           | NO           | 15.6                                      | DE           | 12.1                        | 6.4               | 101                   | DE           | 4.1                 | 1.5                    | DE           | 4.1          | 1.5                    |
| NO           | 1.14           | IE           | 13.5                                      | EE           | 10.5                        | 7.6               | 102                   | CH           | 1.5                 | 1.4                    | SE           | 1.2          | 1.1                    |
| FI           | 1.12           | ES           | 10.2                                      | IT           | 11.7                        | 7.1               | 74                    | NL           | 2.0                 | 1.2                    | NO           | 0.8          | 1.0                    |
| UK           | 1.08           | GR           | 8.7                                       | FR           | 11.7                        | 6.4               | 97                    | UK           | 4.9                 | 0.8                    | FR           | 2.0          | 1.0                    |
| EE           | 1.02           | SE           | 7.5                                       | AT           | 11.0                        | 6.6               | 94                    | ES           | 1.6                 | 0.7                    | DK           | 0.4          | 0.9                    |
| NL           | 1.00           | FI           | 6.8                                       | DK           | 11.3                        | 7.1               | 56                    | AT           | 1.0                 | 0.7                    | NL           | 1.6          | 0.9                    |

*Note.* ISO2 = International Standards Organisation. For country codes, see Table 1. GDP = Gross Domestic Product

## Figures

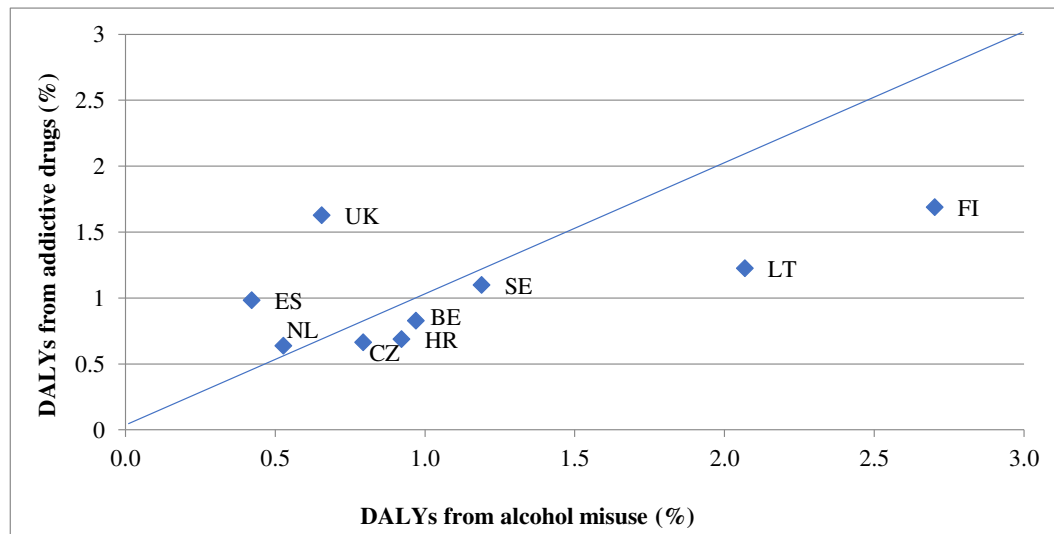

**Figure S1.** The population disease pattern for each country between illicit drug and alcohol misuse.

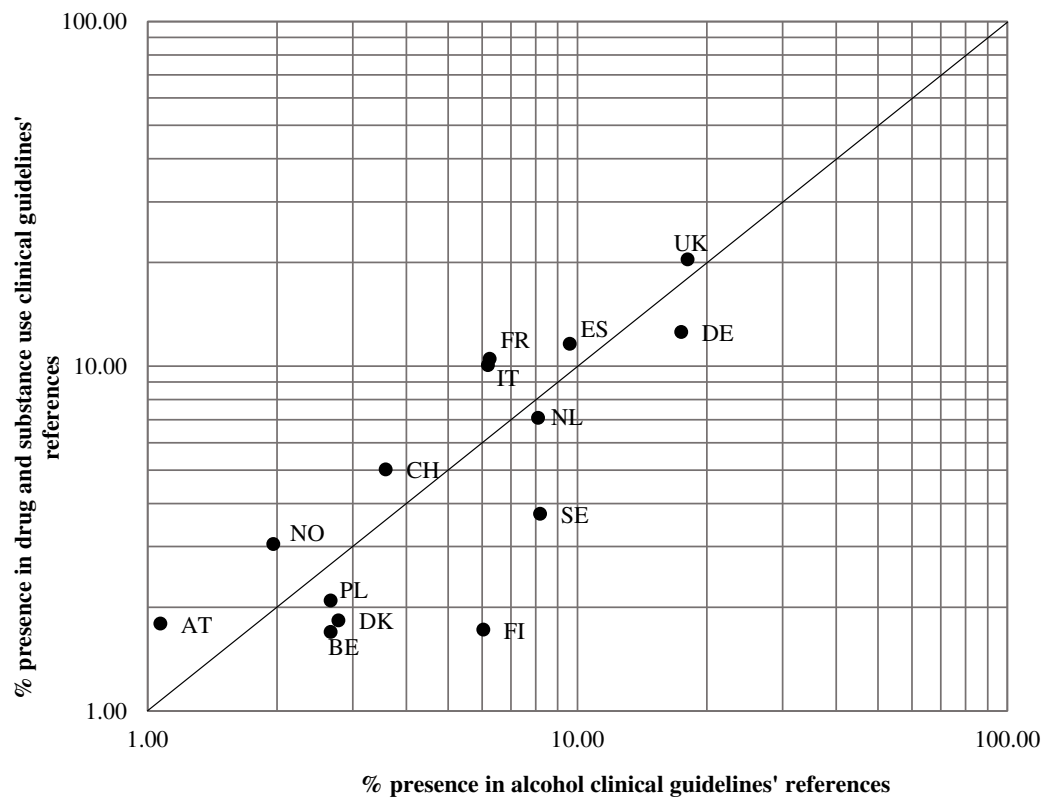

**Figure S2.** The country contribution in research as evident in the clinical practice guidelines on the drug dependence against alcohol misuse (on a  $\log_{10}$  scale),  $p < 0.05$  (country codes are in Table 1).

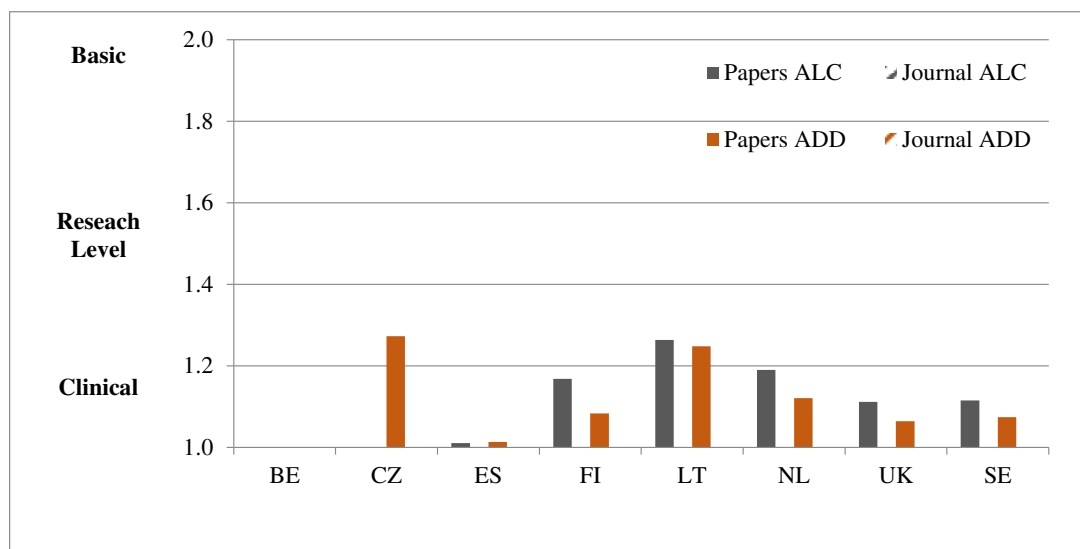

**Figure S3.** The research level (basic, clinical or both) of the cited papers for clinical practice guidelines related to alcohol dependence

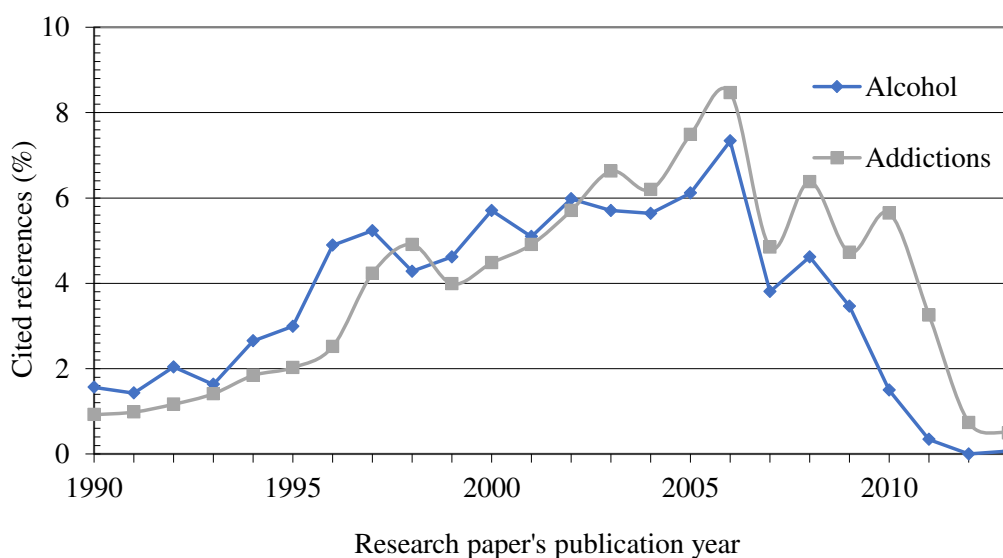

**Figure S4.** The percentage of cited research papers published per year from 1990 to 2013 as reported in the alcohol and drug addictions clinical practice guidelines (published between 2011-2014 for ESMO, 2009-2013 for NICE and 2013 for SIGN) with the difference between the two showing statistical significance,  $p < 0.05$ .

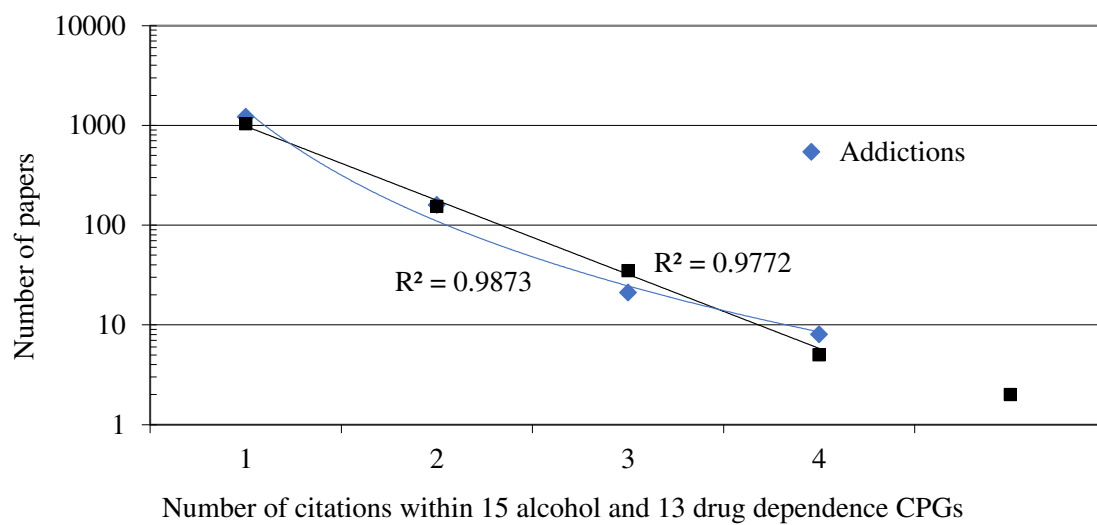

**Figure S5.** The relationship between the number of research papers and number of citations within the clinical practice guidelines (on a log<sub>10</sub> scale).
